# Supplementary material
Source: MDPI journal article supplement (https://www.mdpi.com/2078-2489/15/5/289)
Supplement: s1 [file s1]

---

**Algorithm 1** NDNOTA Consumer Side

---

```

1: Output 1: Handshake Authentication Request Interest (HAR) to AuthServ

2: Output 2: Authentication Request Interest (AR) to AuthServ

3: Output 3: Protected-Content Request Interest to Producer

4: Content Request Interest to Producer
5: Data Packet ← Producer
6: if Data Packet type == 0 (Blob) then
7:   do nothing
8: else if Data Packet type == 3 (NACK) && AuthMsg.Type = 1 then
9:   Extract AuthServer list
10:  if consumer has no AT of one of the AuthServ list then
11:    AuthMsg ← 2 (Handshake-Request State), (2, Consumer public key)
12:    ApplicationParameters ← AuthMsg
13:    HAR Interest ← (AuthServer Name + ApplicationParameters) & Sign Interest with Consumer Signature
14:    Issue HAR to AuthServ → Output 1
15:  else
16:    go to 26
17:  end if
18: end if
19: Data Packet ← AuthServ
20: switch Received Data Packet do
21:  case Handshake-Reply (3) State
22:    Extract CT, AuthServ public key
23:    D-CT ← Decrypt CT with Consumer private key
24:    CT ← Encrypt D-CT with AuthServ public key
25:    AuthMsg ← 4 (Authentication-Request State), (3, CT)
26:    ApplicationParameters ← AuthMsg
27:    AR Interest ← (AuthServer Name + ApplicationParameters) & Sign with Consumer Signature
28:    Issue AR to AuthServ → Output 2
29:  case Authentication-Reply (5) State
30:    Extract & save AT
31: AuthMsg ← 6 (AuthToken State), (1, AuthServ), (4, AT)
32: ApplicationParameters ← AuthMsg
33: Content Request Interest ← (Producer Name + ApplicationParameters) & Sign with Consumer Signature
34: Issue Content Request Interest to Producer → Output 3

```

---

---

**Algorithm 2** NDNOTA Producer Side

---

```

1: Input 1: Content Request Interest from Consumer

2: Output 1: Is-Consumer-Authenticated Interest to AuthServ

3: Output 2: Data Packet to Consumer


---


4: if ApplicationParameters = Empty && requested content != protected then
5:   Issue Data packet that carries requested content
6: else
7:   if ApplicationParameters = Empty && requested content = protected then
8:     AuthMsg ← 1 (Redirect State), (1, list of AuthServs)
9:     Content ← AuthMsg
10:    NACK Data Packet ← (Content) & Sign with Producer Signature
11:  else if AuthMsg.Type = 6 && AuthMsg.Parameter[1].key = 4 then
12:    Extract AT, consumer key-locator
13:    if consumer key-locator is cached then
14:      if received AT = cached AT && NOT expired then
15:        go to 27
16:      else
17:        AuthMsg ← 7 (Is-Consumer-Authenticated State), (2, consumer key-locator), (4, AT)
18:        ApplicationParameters ← AuthMsg
19:        Is-Consumer-Authenticated Interest ← (AuthServer Name + ApplicationParameters) & Sign with Producer Signature
20:        Issue Is-Consumer-Authenticated Interest to AuthServ → Output 1
21:      end if
22:    end if
23:  end if
24:  Data Packet ← AuthServ
25:  if AuthMsg.Type = 8 && AuthMsg.Parameter[0].value = True then
26:    Store consumer key-locator & AT
27:    Data Packet ← (Protected Content) & Sign with Producer Signature
28:    Issue Data Packet with protected content to Consumer → Output 2
29:  else
30:    Issue NACK Data Packet to Consumer → Output 2
31:  end if

```

---

---

**Algorithm 3** NDNOTA AuthServ Side
 

---

```

1: Input 1: Handshake Authentication Request Interest (HAR) from Consumer

2: Output 1: Handshake Reply (HR) Data Packet to Consumer

3: Output 2: Authentication Reply (AR) Data Packet to Consumer

4: Output 3: Authenticate Verification Data Packet to Producer

5: if AuthMsg.Type = 2 then
6:   Extract consumer public key, key-locator
7:   CT ← Generate & encrypt a random token with consumer public key
8:   entry ← Consumer key-locator, Plaintext CT, CT Expiry
9:   AuthMsg ← 3 (Handshake-Reply State), (3, CT)
10:  Content ← AuthMsg
11:  HR Data Packet ← (Content) & Sign with AuthServ Signature
12:  Issue HR Data Packet to Consumer → Output 1
13: end if
14: switch Received Interest Packet do
15:   case Authentication-Request (4) State
16:     Extract CT, consumer key-locator
17:     D-CT ← Decrypt CT with AuthServ private key
18:     if D-CT = entry (CT) then
19:       AT ← Generate & encrypt a random token with AuthServ key
20:       entry ← Consumer key-locator, AT, AT Expiry
21:       AuthMsg ← 5 (Authentication-Reply State), (4, AT)
22:       Content ← AuthMsg
23:       AR Data Packet ← (Content) & Sign with AuthServ Signature
24:       Issue AR Data Packet to Consumer → Output 2
25:     else
26:       Issue NACK Data Packet to Consumer
27:     end if
28:   case Is-Consumer-Authenticated (7) State
29:     Extract AT, consumer key-locator
30:     if AT = entry (AT) then
31:       AuthMsg ← 8 (Authenticated State), (5, True)
32:       Authenticate Confirmation Data Packet ← (Content) & Sign with AuthServ Signature
33:       Issue Authenticate Confirmation Data Packet to Producer → Output 3
34:     else
35:       AuthMsg ← 8 (Authenticated State), (5, False)
36:     end if
37:   Content ← AuthMsg
38:   Authenticate Verification Data Packet ← (Content) & Sign with AuthServ Signature
39:   Issue Authenticate Confirmation Data Packet to Producer → Output 3

```

---
